# Supplementary material for: IdentiCS – Identification of coding sequence and in silico reconstruction of the metabolic network directly from unannotated low-coverage bacterial genome sequence
Source: Springer Nature journal article supplement (doi:10.1186/1471-2105-5-112), 2004-08-16

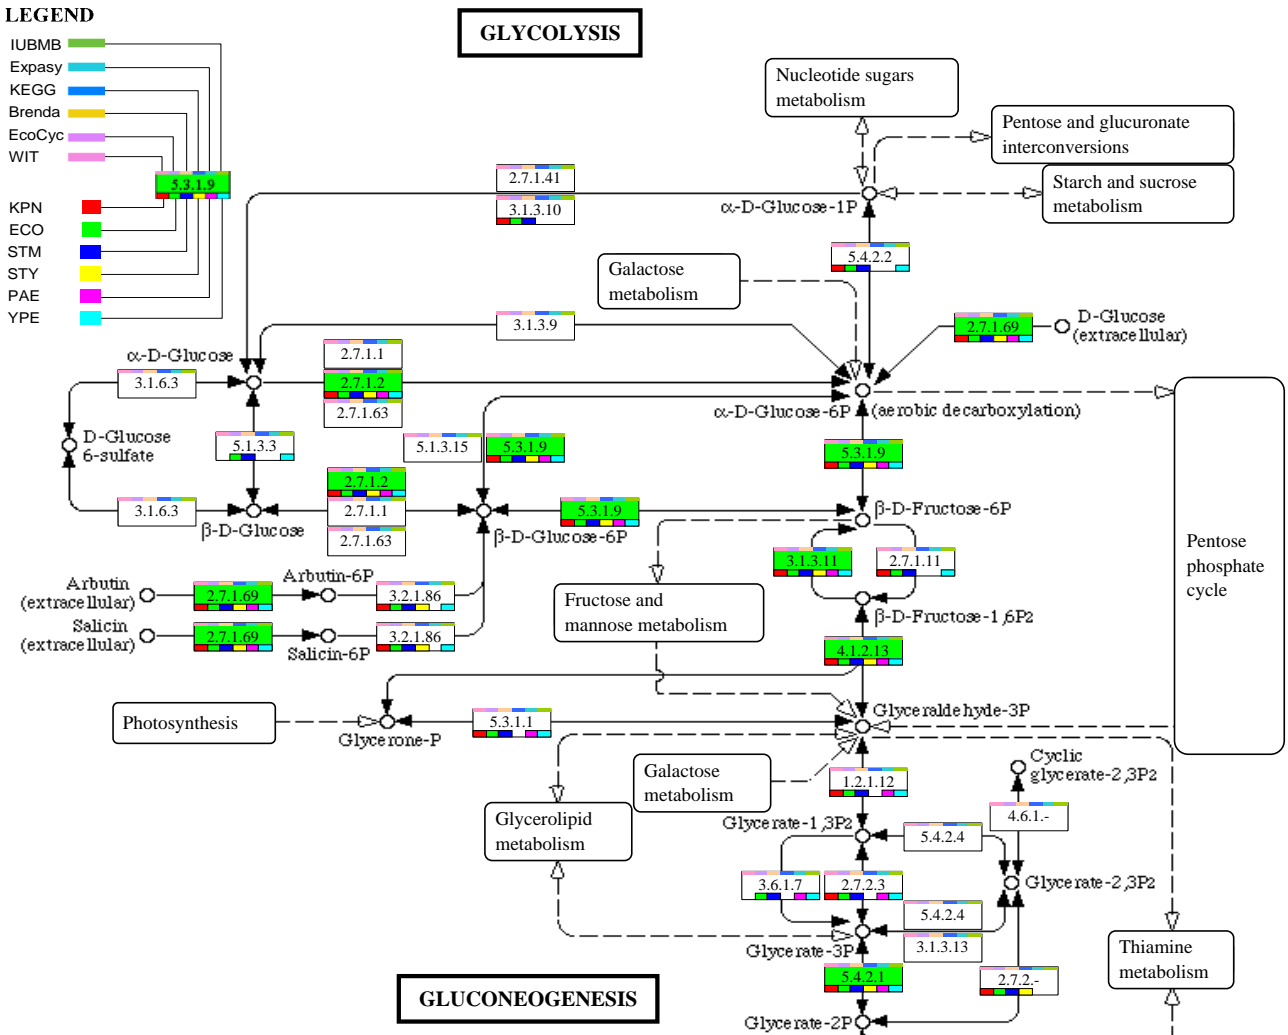

Supplement: 12859_2004_228_MOESM3_ESM.pdf [file 12859_2004_228_MOESM3_ESM.pdf]
